# Supplementary material
Source: PubMed Central journal article supplement (PMC6855384)
Supplement: NIHMS1058286-supplement.pdf [file NIHMS1058286-supplement.pdf]

# Quality and quantity control of gene expression by nonsense-mediated mRNA decay

---

*Tatsuaki Kurosaki, Maximilian W. Popp and Lynne E. Maquat*

<https://doi.org/10.1038/s41580-019-0126-2>

Corrected: Publisher Correction

## Supplementary Box 1: NMD avoidance by viruses and therapeutic approaches and possibilities

---

### NMD avoidance — lessons from viruses

Many viruses produce RNAs with features that should subject them to host-cell nonsense-mediated mRNA decay (NMD). These viruses have evolved various strategies to subvert NMD in order to replicate, and these strategies offer windows through which the mechanism of NMD can be studied (see the table).

***Human Immunodeficiency Virus-1 (HIV-1)***. HIV-1 and other retroviruses use alternative splicing of a single primary transcript to generate the diverse mRNAs that are needed during their lifecycle. For proteins whose synthesis initiates toward the 3'-end of the transcript, splicing upstream of the coding region poses no risk of engaging NMD, as the corresponding termination codons are recognized as normal. However, for proteins encoded toward the 5'-end of the transcript, the virus must avoid splicing downstream of the termination codon in order to circumvent NMD. Thus, HIV-1 tightly controls splicing to ensure that intron removal proceeds in 5'-to-3' order to generate transcripts where the coding region is downstream of exon–exon junctions, and it uses the Rev accessory protein, which is produced early in the virus life-cycle to export to the cytoplasm incompletely spliced RNAs encoding proteins from their 5'-ends<sup>1</sup>.

***Human T-Lymphotropic Virus Type 1 (HTLV-1)***. HTLV-1 directly inhibits NMD by expressing the Tax protein, which antagonizes NMD by interacting with UPF1<sup>2</sup>. This interaction causes UPF1 phosphorylation and sequesters it in P-bodies. It also prevents UPF1 association with eIF3, which is critical for the step of translation repression that precedes mRNA decay. By preventing the return of UPF1 to its basal, hypo-phosphorylated state, it is thought that HTLV-1 prevents UPF1 from participating in further rounds of NMD. Consistent with this hypothesis, NMD is inhibited in cells expressing variants of SMG5 that are unable to recruit the PP2A holoenzyme, the phosphatase that dephosphorylates UPF1<sup>3</sup>. Furthermore, NMD is inhibited in cells that express an inactive variant of UPF1 or when cells are exposed to okadaic acid, which inhibits PP2A function<sup>4-6</sup>. Tax additionally inhibits NMD by plugging the RNA channel of UPF1, resulting in RNA-binding UPF1 translocation defects<sup>7</sup>. Another HTLV-1 protein, Rex, appears to inhibit NMD by unknown mechanisms<sup>8</sup>.

***Rous Sarcoma Virus (RSV)***. The retrovirus RSV also uses alternative splicing to generate multiple protein-coding mRNAs from a single pre-mRNA. However, the resulting unusually long ~7-kilobase 3' untranslated region (3'UTR; see *EJC-independent NMD*) fails to trigger NMD since the virus has evolved a Rous Stability Element (RSE), which is a 400-nucleotide sequence situated immediately downstream of the termination codon of *gag* mRNA (that is, in the unspliced pre-mRNA)<sup>9</sup>. Polypyrimidine tract-binding protein 1 (PTBP1) binds the RSE and shields the mRNA from NMD by preventing UPF1 loading and accumulation on the 3'UTR<sup>10</sup>. This mechanism is expected to exist in many cellular mRNAs that escape NMD but are computationally predicted to be NMD targets due to their long, unstructured 3'UTR that does not bring the termination codon sufficiently close to polyadenylate-binding protein 1, although the interfering protein can be other than PTBP1<sup>11</sup>.

***Hepatitis C Virus (HCV)***. Replication of HCV interferes with NMD<sup>12</sup>. The HCV core protein interacts with and sequesters the host protein partner of Y14 and mago (PYM1), which associates with exon junction complexes (EJCs) to promote their recycling<sup>13</sup>. Tethering PYM1 to the 3'UTR of a reporter mRNA results in mRNA degradation; for this and other reasons, PYM1 is thought to have a role in NMD<sup>14</sup>. Thus, it seems that sequestration of PYM1 by the viral core protein would attenuate NMD. How sequestration benefits the virus remains unknown. Although downregulating core NMD components did not boost viral titers, this experiment was done in a setting where the viral core protein–PYM1 interaction was fully intact so that NMD was already inhibited, possibly masking the effects of downregulating NMD factors on viral replication<sup>12</sup>.

***Semliki Forest Virus (SFV) and Sindbis Virus (SINV)***. Recently, it was shown that mammalian cells exploit NMD to restrict positive-strand RNA virus replication during infection by SFV and distantly related SINV family members<sup>15</sup>. The viral plus-strand RNA genomes act as an mRNA encoding non-structural proteins (nsPs) and also as template for the complementary negative-strand RNA that is used to direct viral genome replication. A small interfering RNA (siRNA) screen found that cellular UPF1 restricts SFV and SINV replication<sup>15</sup>. In support of the involvement of NMD in suppressing virus replication, downregulating SMG5 or SMG7 augmented SFV replication. When plus-strand RNA is used as mRNA, the nsPs are translated from one ORF at the 5'-end of the RNA, leaving a large 4000-nucleotide 3'UTR. This 3'UTR does not engage NMD factors as deletion of most of the 3'UTR still allowed suppression of viral replication by UPF1, leaving open the possibility that other *cis*-acting signals mediate UPF1 engagement. As expected, the virus attempts to protect its genome from UPF1 later during infection by sequestering its own replication intermediates within membranous replication factories that are devoid of protein synthesis factors (and thus NMD factors). Also, the viral replicase inhibits UPF1, possibly by displacing it from plus-strand RNA as point mutations that slow the replicase increase the sensitivity of the virus to UPF1

binding. Alternatively, nsP3 may directly inhibit NMD given that a mutant virus lacking the C-terminal domain of nsP3 is more sensitive to the presence of UPF1 than other viruses with nsP3 variants.

**Zika Virus (ZIKV).** As with SFV and SINV, NMD restricts ZIKV<sup>16</sup>, which is a mosquito-borne plus-strand RNA virus. Experimental knockdown of UPF1 boosts viral titers, indicating that ZIKV has evolved a method for attenuating UPF1 activity during the course of infection. The ZIKV capsid forms a complex with UPF1 and directs its proteasomal degradation, thereby dampening NMD<sup>16</sup>.

## **Therapeutic approaches and possibilities for targeting NMD**

**Translation read-through.** During translation, aminoacylated tRNAs are recruited, one after another, into the translocating A site of the ribosome. The anticodon–codon base-pairing formed between each aminoacylated tRNA and the mRNA can be cognate (perfectly matched) or near-cognate (allowing one nucleotide mismatch). When the ribosome reaches a termination codon, the eRF1–eRF3 termination complex is recruited instead of an aminoacyl tRNA to facilitate peptidyl tRNA hydrolysis and release of the newly synthesized polypeptide. A small subset of near-cognate tRNAs can compete with the eRF1–eRF3 termination complex in occupying the ribosomal A site, thereby causing PTC read-through, or nonsense suppression<sup>17</sup>. As expected, the fidelity of translation is normally high — PTC read-through occurs in <1% of translation events and read-through at normal termination codons occurs one order of magnitude less than PTC read-through<sup>17-19</sup>.

Nonsense mutations are estimated to account for ~11% of all genetic disease-causing mutations<sup>20</sup> and thus represent a fertile area for disease intervention using various nonsense suppressors. Nonsense suppressors, which include aminoglycosides, aminoglycoside derivatives (NB30, NB54, NB84, NB124), ataluren (PTC124), read-through compound 13 (RTC13), RTC14 and amlexanox, enhance ribosome read-through at PTCs to produce full-length proteins. Aminoglycosides, including gentamycin, paromomycin, G418 (geneticin), streptomycin, amikacin, lividomycin and tobramycin are the best-characterized nonsense suppressors to have been tested in individuals with genetic diseases such as cystic fibrosis<sup>21-35</sup>, Duchenne muscular dystrophy<sup>26,28,36-42</sup>, congenital muscular dystrophy<sup>43</sup>, ataxia telangiectasia<sup>44-46</sup>, Rett syndrome<sup>47-50</sup>, type 1 User syndrome<sup>51-54</sup>, Hurler syndrome<sup>55-58</sup>, haemophilia A and B<sup>59,60</sup>, cancer<sup>26,57</sup>, Maroteaux–Lamy syndrome<sup>61</sup>, carnitine palmitoyltransferase 1A deficiency<sup>62</sup>,

methylmalonic aciduria<sup>63</sup>, neuronal ceroid lipofuscinosis<sup>64,65</sup>, spinal muscular atrophy<sup>66</sup>, peroxisome biogenesis disorders<sup>67,68</sup>, obesity<sup>69</sup>, aniridia<sup>70</sup>, Hailey–Hailey disease<sup>71</sup>, dystrophic epidermolysis bullosa<sup>72</sup> and Hurler junctional epidermolysis bullosa<sup>73</sup>.

The general therapeutic approach to using nonsense suppressors has the advantage of being transcript-unspecific and thus would be applicable to many diseases. However, they are only able to promote the production of a limited amount of PTC-containing transcripts and full-length proteins, in part owing to being toxic by targeting many cellular NMD targets. Thus, the therapeutic efficacy of nonsense suppressors depends on how much PTC-containing transcript is needed to ameliorate the disease phenotype. For example, aminoglycosides, which enter cells through endocytic receptors that are enriched in kidney cells and hair cells of the inner ear<sup>74</sup>, trigger apoptosis and necrosis<sup>75,76</sup>. Thus, these drugs cause nephrotoxicity and ototoxicity in ~2–25% of patients<sup>77</sup>. In addition, since aminoglycosides target the bacterial ribosome and given the similarity of the bacterial ribosome to the mitochondrial ribosome, aminoglycosides cause mitochondrial dysfunction<sup>78</sup>. These and other problems have encouraged the search for safer yet adequately effective therapeutics.

***Inhibition of NMD factors.*** An alternative therapeutic approach is to directly inhibit NMD by targeting NMD factors with small molecules. For example, wortmannin and caffeine inhibit a number of kinases, including SMG1<sup>79,80</sup>. Pateamine A binds eIF4A3 to inhibit its function in 3'UTR-EJC-mediated NMD<sup>81</sup>. Curcumin inhibits histone acetyltransferase (HAT) p300/CBP<sup>82</sup> and, among other effects, reduces *UPF1* gene transcription by reducing the amount of acetylated histone H3 Lys 27 and of RNA polymerase II at the *UPF1* promoter; pateamine A also reduces the levels of UPF2, UPF3 and UPF3X<sup>83</sup>. Cardiac glycosides inhibit the sodium–potassium ATPase in the plasma membrane, thereby elevating the intracellular calcium level. This inhibits NMD by an unknown mechanism<sup>84</sup>. NMD inhibitor 1 (NMDI1) blocks the interaction of UPF1 and SMG5, thereby transferring NMD-targeted mRNAs into translationally inactive cytoplasmic P-bodies<sup>85</sup>. NMDI14 binds to a pocket in SMG7 and disrupts its interaction with UPF1<sup>86</sup>. 5-azacytidine induces *MYC* gene expression<sup>87</sup>, which inhibits NMD (see *Adaptation to stress and environment*). Cytoskeleton disrupting agents such as cytochalasin D, jasplakinolide, colchicine or taxotere can inhibit NMD, and cytochalasin D and jasplakinolide also induce PTC read-through<sup>88</sup>.

A potential problem with using many of these small molecules is their specificity: some compounds may be either promiscuous in their targeting or they may target fundamental cellular pathways and have many effects secondary to NMD inhibition. For example, because curcumin targets the HAT p300<sup>82</sup>, it changes the transcriptional output of a number of loci in addition to *UPF1*. Targeting such a general process such as transcription almost certainly leads to secondary effects. Therefore, more specific therapeutic siRNAs and chemically modified antisense oligonucleotides (ASOs) targeting NMD factors have been used to directly inhibit NMD<sup>89,90</sup>. These NMD-specific approaches are restricted to

diseases in which the mutated genes produces partially functional proteins (see *NMD modulates inherited diseases*); alternatively, they would require combination therapy with a nonsense suppressor to produce full-length, functional proteins. For most small-molecule NMD inhibitors, the molecular basis for inhibition and cellular toxicity remain to be thoroughly examined. In addition, since NMD not only eliminates aberrant mRNAs but also maintains proper expression levels of non-mutated cellular mRNAs, therapeutic doses of NMD inhibitors may cause unforeseen side effects.

**Targeting NMD-substrate mRNAs.** To address the above specificity concerns, several approaches to targeting PTC-containing mRNAs have been explored. Using chemically modified ASOs, EJC formation  $\geq 50$ –55-nucleotides downstream of a PTC was physically blocked to inhibit 3'UTR-EJC-mediated NMD<sup>91</sup>. Because simple inhibition of NMD generally promotes stabilization of the PTC-containing mRNA, which may encode a toxic truncated protein, this ASO-based method would need to be combined with read-through therapy. Pseudouridylation, which is the most abundant post-transcriptional modification in cellular non-coding RNAs, can alter the recognition of nonsense codons to sense codons and has been experimentally directed to modify PTCs in yeast cells using artificial guide RNAs<sup>92</sup>. Specifically, pseudouridylated UAA or UAG stop codons encode serine or threonine, whereas pseudouridylated UGA encodes tyrosine or phenylalanine. Although this approach would not alter any other cellular process, i.e. NMD or global translation, functional analysis of the protein containing newly introduced missense amino acids would be required should the amino acid replacement not be synonymous with the original amino acid. Moreover, this target-specific approach must be examined in human cells. Recently, a high throughput screen identified anti-codon engineered transfer RNAs (ACE-tRNAs) that can suppress PTCs by inserting the correct cognate amino acid needed to repair particular disease-causing mutations in human cells<sup>93</sup>. Importantly, ribosome profiling shows little evidence for readthrough of endogenous termination codons in cells expressing ACE-tRNAs<sup>93</sup>.

Experiments have also focused on mRNAs harbouring NMD-insensitive mutations (see *NMD modulates inherited diseases*). Such mRNAs produce toxic truncated proteins and promote disease, for example in the case of certain cancer-causing adenomatous polyposis coli (*APC*) or *BRCA1* gene mutations<sup>94</sup>. Expression of these NMD-insensitive mRNAs was reduced using microRNAs. However, since microRNAs will also target the mRNA produced from the normal allele, it is important to identify microRNA concentrations that will sufficiently reduce the expression of the defective mRNA while maintain adequate levels of the wild-type mRNA and protein<sup>95-100</sup>.

### **Table: Virus-mediated modulation of host-cell NMD**

| <b>Virus</b> | <b>Mechanism</b> | <b>Purpose</b> | <b>References</b> |
|--------------|------------------|----------------|-------------------|
|--------------|------------------|----------------|-------------------|

---

|        |                                                                                                                                                                                                                                                              |                                                  |       |
|--------|--------------------------------------------------------------------------------------------------------------------------------------------------------------------------------------------------------------------------------------------------------------|--------------------------------------------------|-------|
| HTLV-1 | Cellular NMD is inhibited:<br>- Viral Tax protein sequesters cellular UPF1 into P-bodies so that UPF1 cannot bind cellular eIF3 or undergo dephosphorylation;<br>- Tax also plugs RNA channel of UPF1;<br>- Viral Rex protein inhibits NMD by unknown means. | Promotes virus production                        | 2,7,8 |
| RSV    | NMD of viral RNA is inhibited: Rous stability elements (RSEs) in viral transcripts recruit host PTBP1, which antagonizes UPF1 binding to viral RNA.                                                                                                          | Promotes virus production                        | 9,10  |
| HCV    | Cellular NMD is inhibited: Viral core protein sequesters PYM1, thereby preventing EJC recycling.                                                                                                                                                             | Unknown, presumably promotes the viral lifecycle | 12    |
| SFV    | NMD of viral RNA is inhibited:<br>- Viral replicase protein competes with UPF1 for binding to viral RNA, thereby preventing the NMD of viral RNA;<br>- Viral non-structural proteins may directly inhibit UPF1, thereby inhibiting cellular NMD.             | Promotes virus production                        | 15    |
| ZIKV   | Cellular NMD is inhibited: Viral capsid protein binding to UPF1 leads to proteasome-mediated UPF1 degradation.                                                                                                                                               | Promotes virus production                        | 16    |

EJC, exon junction complex; PTBP1, polypyrimidine tract-binding protein 1; PYM1, partner of Y14 and mago.

## References:

- 1 Bohne, J., Wodrich, H. & Krausslich, H. G. Splicing of human immunodeficiency virus RNA is position-dependent suggesting sequential removal of introns from the 5' end. *Nucleic Acids Res* **33**, 825-837, (2005).
- 2 Mocquet, V. *et al.* The human T-lymphotropic virus type 1 tax protein inhibits nonsense-mediated mRNA decay by interacting with INT6/EIF3E and UPF1. *J Virol* **86**, 7530-7543, (2012).
- 3 Ohnishi, T. *et al.* Phosphorylation of hUPF1 induces formation of mRNA surveillance complexes containing hSMG-5 and hSMG-7. *Mol Cell* **12**, 1187-1200, (2003).
- 4 Franks, T. M., Singh, G. & Lykke-Andersen, J. Upf1 ATPase-dependent mRNP disassembly is required for completion of nonsense-mediated mRNA decay. *Cell* **143**, 938-950, (2010).
- 5 Isken, O. *et al.* Upf1 phosphorylation triggers translational repression during nonsense-mediated mRNA decay. *Cell* **133**, 314-327, (2008).
- 6 Kurosaki, T. *et al.* A post-translational regulatory switch on UPF1 controls targeted mRNA degradation. *Genes Dev* **28**, 1900-1916, (2014).
- 7 Fiorini, F. *et al.* HTLV-1 Tax plugs and freezes UPF1 helicase leading to nonsense-mediated mRNA decay inhibition. *Nat Commun* **9**, 431, (2018).
- 8 Nakano, K. *et al.* Viral interference with host mRNA surveillance, the nonsense-mediated mRNA decay (NMD) pathway, through a new function of HTLV-1 Rex: implications for retroviral replication. *Microbes Infect* **15**, 491-505, (2013).
- 9 Barker, G. F. & Beemon, K. Rous sarcoma virus RNA stability requires an open reading frame in the gag gene and sequences downstream of the gag-pol junction. *Mol Cell Biol* **14**, 1986-1996, (1994).
- 10 Ge, Z., Quek, B. L., Beemon, K. L. & Hogg, J. R. Polypyrimidine tract binding protein 1 protects mRNAs from recognition by the nonsense-mediated mRNA decay pathway. *Elife* **5**, (2016).

11 Kishor, A., Ge, Z. & Hogg, J. R. hnRNP L-dependent protection of normal mRNAs from NMD subverts quality control in B cell lymphoma. *EMBO J* **38**, (2019).

12 Ramage, H. R. *et al.* A combined proteomics/genomics approach links hepatitis C virus infection with nonsense-mediated mRNA decay. *Mol Cell* **57**, 329-340, (2015).

13 Gehring, N. H., Lamprinaki, S., Kulozik, A. E. & Hentze, M. W. Disassembly of exon junction complexes by PYM. *Cell* **137**, 536-548, (2009).

14 Bono, F. *et al.* Molecular insights into the interaction of PYM with the Mago-Y14 core of the exon junction complex. *EMBO Rep* **5**, 304-310, (2004).

15 Balistreri, G. *et al.* The host nonsense-mediated mRNA decay pathway restricts mammalian RNA virus replication. *Cell Host Microbe* **16**, 403-411, (2014).

16 Fontaine, K. A. *et al.* The cellular NMD pathway restricts Zika Virus infection and is targeted by the viral capsid protein. *MBio* **9**, (2018).

17 Manuvakhova, M., Keeling, K. & Bedwell, D. M. Aminoglycoside antibiotics mediate context-dependent suppression of termination codons in a mammalian translation system. *RNA* **6**, 1044-1055, (2000).

18 Cassan, M. & Rousset, J. P. UAG readthrough in mammalian cells: effect of upstream and downstream stop codon contexts reveal different signals. *BMC Mol Biol* **2**, 3, (2001).

19 McCaughan, K. K., Brown, C. M., Dalphin, M. E., Berry, M. J. & Tate, W. P. Translational termination efficiency in mammals is influenced by the base following the stop codon. *Proc Natl Acad Sci U S A* **92**, 5431-5435, (1995).

20 Lee, H. L. & Dougherty, J. P. Pharmaceutical therapies to recode nonsense mutations in inherited diseases. *Pharmacol Ther* **136**, 227-266, (2012).

21 Bedwell, D. M. *et al.* Suppression of a CFTR premature stop mutation in a bronchial epithelial cell line. *Nat Med* **3**, 1280-1284, (1997).

22 Clancy, J. P. *et al.* Evidence that systemic gentamicin suppresses premature stop mutations in patients with cystic fibrosis. *Am J Respir Crit Care Med* **163**, 1683-1692, (2001).

23 Du, M. *et al.* Aminoglycoside suppression of a premature stop mutation in a Cfr<sup>-/-</sup> mouse carrying a human CFTR-G542X transgene. *J Mol Med (Berl)* **80**, 595-604, (2002).

24 Du, M. *et al.* Clinical doses of amikacin provide more effective suppression of the human CFTR-G542X stop mutation than gentamicin in a transgenic CF mouse model. *J Mol Med (Berl)* **84**, 573-582, (2006).

25 Du, M. *et al.* PTC124 is an orally bioavailable compound that promotes suppression of the human CFTR-G542X nonsense allele in a CF mouse model. *Proc Natl Acad Sci U S A* **105**, 2064-2069, (2008).

26 Gonzalez-Hilarion, S. *et al.* Rescue of nonsense mutations by amlexanox in human cells. *Orphanet J Rare Dis* **7**, 58, (2012).

27 Howard, M., Frizzell, R. A. & Bedwell, D. M. Aminoglycoside antibiotics restore CFTR function by overcoming premature stop mutations. *Nat Med* **2**, 467-469, (1996).

28 Kayali, R. *et al.* Read-through compound 13 restores dystrophin expression and improves muscle function in the mdx mouse model for Duchenne muscular dystrophy. *Hum Mol Genet* **21**, 4007-4020, (2012).

29 Nudelman, I. *et al.* Repairing faulty genes by aminoglycosides: development of new derivatives of geneticin (G418) with enhanced suppression of diseases-causing nonsense mutations. *Bioorg Med Chem* **18**, 3735-3746, (2010).

30 Nudelman, I. *et al.* Development of novel aminoglycoside (NB54) with reduced toxicity and enhanced suppression of disease-causing premature stop mutations. *J Med Chem* **52**, 2836-2845, (2009).

31 Rowe, S. M. *et al.* Suppression of CFTR premature termination codons and rescue of CFTR protein and function by the synthetic aminoglycoside NB54. *J Mol Med (Berl)* **89**, 1149-1161, (2011).

32 Rowe, S. M. *et al.* Restoration of W1282X CFTR activity by enhanced expression. *Am J Respir Cell Mol Biol* **37**, 347-356, (2007).

33 Sermet-Gaudelus, I. *et al.* Ataluren (PTC124) induces cystic fibrosis transmembrane conductance regulator protein expression and activity in children with nonsense mutation cystic fibrosis. *Am J Respir Crit Care Med* **182**, 1262-1272, (2010).

34 Wilschanski, M. *et al.* Gentamicin-induced correction of CFTR function in patients with cystic fibrosis and CFTR stop mutations. *N Engl J Med* **349**, 1433-1441, (2003).

35 Xue, X. *et al.* Synthetic aminoglycosides efficiently suppress cystic fibrosis transmembrane conductance regulator nonsense mutations and are enhanced by ivacaftor. *Am J Respir Cell Mol Biol* **50**, 805-816, (2014).

36 Barton-Davis, E. R., Cordier, L., Shoturma, D. I., Leland, S. E. & Sweeney, H. L. Aminoglycoside antibiotics restore dystrophin function to skeletal muscles of mdx mice. *J Clin Invest* **104**, 375-381, (1999).

37 Bidou, L. *et al.* Premature stop codons involved in muscular dystrophies show a broad spectrum of readthrough efficiencies in response to gentamicin treatment. *Gene Ther* **11**, 619-627, (2004).

38 Dunant, P., Walter, M. C., Karpati, G. & Lochmuller, H. Gentamicin fails to increase dystrophin expression in dystrophin-deficient muscle. *Muscle Nerve* **27**, 624-627, (2003).

39 Howard, M. T. *et al.* Readthrough of dystrophin stop codon mutations induced by aminoglycosides. *Ann Neurol* **55**, 422-426, (2004).



- 40 Howard, M. T. *et al.* Sequence specificity of aminoglycoside-induced stop codon readthrough: potential implications for treatment of Duchenne muscular dystrophy. *Ann Neurol* **48**, 164-169, (2000).
- 41 Loufrani, L. *et al.* Absence of dystrophin in mice reduces NO-dependent vascular function and vascular density: total recovery after a treatment with the aminoglycoside gentamicin. *Arterioscler Thromb Vasc Biol* **24**, 671-676, (2004).
- 42 Welch, E. M. *et al.* PTC124 targets genetic disorders caused by nonsense mutations. *Nature* **447**, 87-91, (2007).
- 43 Allamand, V. *et al.* Drug-induced readthrough of premature stop codons leads to the stabilization of laminin alpha2 chain mRNA in CMD myotubes. *J Gene Med* **10**, 217-224, (2008).
- 44 Du, L. *et al.* Nonaminoglycoside compounds induce readthrough of nonsense mutations. *J Exp Med* **206**, 2285-2297, (2009).
- 45 Lai, C. H. *et al.* Correction of ATM gene function by aminoglycoside-induced read-through of premature termination codons. *Proc Natl Acad Sci U S A* **101**, 15676-15681, (2004).
- 46 Nakamura, K. *et al.* Functional characterization and targeted correction of ATM mutations identified in Japanese patients with ataxia-telangiectasia. *Hum Mutat* **33**, 198-208, (2012).
- 47 Brendel, C. *et al.* Readthrough of nonsense mutations in Rett syndrome: evaluation of novel aminoglycosides and generation of a new mouse model. *J Mol Med (Berl)* **89**, 389-398, (2011).
- 48 Brendel, C., Klahold, E., Gartner, J. & Huppke, P. Suppression of nonsense mutations in Rett syndrome by aminoglycoside antibiotics. *Pediatr Res* **65**, 520-523, (2009).
- 49 Popescu, A. C., Sidorova, E., Zhang, G. & Eubanks, J. H. Aminoglycoside-mediated partial suppression of MECP2 nonsense mutations responsible for Rett syndrome in vitro. *J Neurosci Res* **88**, 2316-2324, (2010).
- 50 Vecsler, M. *et al.* Ex vivo treatment with a novel synthetic aminoglycoside NB54 in primary fibroblasts from Rett syndrome patients suppresses MECP2 nonsense mutations. *PLoS One* **6**, e20733, (2011).
- 51 Goldmann, T. *et al.* A comparative evaluation of NB30, NB54 and PTC124 in translational read-through efficacy for treatment of an USH1C nonsense mutation. *EMBO Mol Med* **4**, 1186-1199, (2012).
- 52 Goldmann, T., Overlack, N., Wolfrum, U. & Nagel-Wolfrum, K. PTC124-mediated translational readthrough of a nonsense mutation causing Usher syndrome type 1C. *Hum Gene Ther* **22**, 537-547, (2011).
- 53 Nudelman, I. *et al.* Redesign of aminoglycosides for treatment of human genetic diseases caused by premature stop mutations. *Bioorg Med Chem Lett* **16**, 6310-6315, (2006).
- 54 Rebibo-Sabbah, A., Nudelman, I., Ahmed, Z. M., Baasov, T. & Ben-Yosef, T. In vitro and ex vivo suppression by aminoglycosides of PCDH15 nonsense mutations underlying type 1 Usher syndrome. *Hum Genet* **122**, 373-381, (2007).
- 55 Hein, L. K. *et al.* alpha-L-iduronidase premature stop codons and potential read-through in mucopolysaccharidosis type I patients. *J Mol Biol* **338**, 453-462, (2004).
- 56 Keeling, K. M. & Bedwell, D. M. Clinically relevant aminoglycosides can suppress disease-associated premature stop mutations in the IDUA and P53 cDNAs in a mammalian translation system. *J Mol Med (Berl)* **80**, 367-376, (2002).
- 57 Keeling, K. M. *et al.* Gentamicin-mediated suppression of Hurler syndrome stop mutations restores a low level of alpha-L-iduronidase activity and reduces lysosomal glycosaminoglycan accumulation. *Hum Mol Genet* **10**, 291-299, (2001).
- 58 Wang, D. *et al.* The designer aminoglycoside NB84 significantly reduces glycosaminoglycan accumulation associated with MPS I-H in the Idua-W392X mouse. *Mol Genet Metab* **105**, 116-125, (2012).
- 59 James, P. D. *et al.* Aminoglycoside suppression of nonsense mutations in severe hemophilia. *Blood* **106**, 3043-3048, (2005).
- 60 Yang, C. *et al.* A mouse model for nonsense mutation bypass therapy shows a dramatic multiday response to geneticin. *Proc Natl Acad Sci U S A* **104**, 15394-15399, (2007).
- 61 Bartolomeo, R., Polishchuk, E. V., Volpi, N., Polishchuk, R. S. & Auricchio, A. Pharmacological read-through of nonsense ARSB mutations as a potential therapeutic approach for mucopolysaccharidosis VI. *J Inherit Metab Dis* **36**, 363-371, (2013).
- 62 Tan, L., Narayan, S. B., Chen, J., Meyers, G. D. & Bennett, M. J. PTC124 improves readthrough and increases enzymatic activity of the CPT1A R160X nonsense mutation. *J Inherit Metab Dis* **34**, 443-447, (2011).
- 63 Buck, N. E., Wood, L., Hu, R. & Peters, H. L. Stop codon read-through of a methylmalonic aciduria mutation. *Mol Genet Metab* **97**, 244-249, (2009).
- 64 Sarkar, C., Zhang, Z. & Mukherjee, A. B. Stop codon read-through with PTC124 induces palmitoyl-protein thioesterase-1 activity, reduces thioester load and suppresses apoptosis in cultured cells from INCL patients. *Mol Genet Metab* **104**, 338-345, (2011).
- 65 Sleat, D. E., Sohar, I., Gin, R. M. & Lobel, P. Aminoglycoside-mediated suppression of nonsense mutations in late infantile neuronal ceroid lipofuscinosis. *Eur J Paediatr Neurol* **5 Suppl A**, 57-62, (2001).

- 66 Wolstencroft, E. C., Mattis, V., Bajer, A. A., Young, P. J. & Lorson, C. L. A non-sequence-specific requirement for SMN protein activity: the role of aminoglycosides in inducing elevated SMN protein levels. *Hum Mol Genet* **14**, 1199-1210, (2005).
- 67 Allen, L. A. & Raetz, C. R. Partial phenotypic suppression of a peroxisome-deficient animal cell mutant treated with aminoglycoside G418. *J Biol Chem* **267**, 13191-13199, (1992).
- 68 Dranchak, P. K. *et al.* Nonsense suppressor therapies rescue peroxisome lipid metabolism and assembly in cells from patients with specific PEX gene mutations. *J Cell Biochem* **112**, 1250-1258, (2011).
- 69 Brumm, H. *et al.* Rescue of melanocortin 4 receptor (MC4R) nonsense mutations by aminoglycoside-mediated read-through. *Obesity (Silver Spring)* **20**, 1074-1081, (2012).
- 70 Wang, X. *et al.* Efficacy of postnatal in vivo nonsense suppression therapy in a Pax6 mouse model of aniridia. *Mol Ther Nucleic Acids* **7**, 417-428, (2017).
- 71 Kellermayer, R., Szigeti, R., Keeling, K. M., Bedekovics, T. & Bedwell, D. M. Aminoglycosides as potential pharmacogenetic agents in the treatment of Hailey-Hailey disease. *J Invest Dermatol* **126**, 229-231, (2006).
- 72 Atanasova, V. S. *et al.* Amlexanox enhances premature termination codon read-through in COL7A1 and expression of full length Type VII collagen: Potential therapy for recessive dystrophic epidermolysis bullosa. *J Invest Dermatol* **137**, 1842-1849, (2017).
- 73 Lincoln, V. *et al.* Gentamicin induces LAMB3 nonsense mutation readthrough and restores functional laminin 332 in junctional epidermolysis bullosa. *Proc Natl Acad Sci U S A* **115**, E6536-E6545, (2018).
- 74 Moestrup, S. K. *et al.* Evidence that epithelial glycoprotein 330/megalin mediates uptake of polybasic drugs. *J Clin Invest* **96**, 1404-1413, (1995).
- 75 Karasawa, T. & Steyger, P. S. Intracellular mechanisms of aminoglycoside-induced cytotoxicity. *Integr Biol (Camb)* **3**, 879-886, (2011).
- 76 Lopez-Novoa, J. M., Quiros, Y., Vicente, L., Morales, A. I. & Lopez-Hernandez, F. J. New insights into the mechanism of aminoglycoside nephrotoxicity: an integrative point of view. *Kidney Int* **79**, 33-45, (2011).
- 77 Keeling, K. M., Wang, D., Conard, S. E. & Bedwell, D. M. Suppression of premature termination codons as a therapeutic approach. *Crit Rev Biochem Mol Biol* **47**, 444-463, (2012).
- 78 Hobbie, S. N. *et al.* Genetic analysis of interactions with eukaryotic rRNA identify the mitoribosome as target in aminoglycoside ototoxicity. *Proc Natl Acad Sci U S A* **105**, 20888-20893, (2008).
- 79 Usuki, F. *et al.* Inhibition of nonsense-mediated mRNA decay rescues the phenotype in Ullrich's disease. *Ann Neurol* **55**, 740-744, (2004).
- 80 Yamashita, A., Ohnishi, T., Kashima, I., Taya, Y. & Ohno, S. Human SMG-1, a novel phosphatidylinositol 3-kinase-related protein kinase, associates with components of the mRNA surveillance complex and is involved in the regulation of nonsense-mediated mRNA decay. *Genes Dev* **15**, 2215-2228, (2001).
- 81 Dang, Y. *et al.* Inhibition of nonsense-mediated mRNA decay by the natural product pateamine A through eukaryotic initiation factor 4AIII. *J Biol Chem* **284**, 23613-23621, (2009).
- 82 Balasubramanyam, K. *et al.* Curcumin, a novel p300/CREB-binding protein-specific inhibitor of acetyltransferase, represses the acetylation of histone/nonhistone proteins and histone acetyltransferase-dependent chromatin transcription. *J Biol Chem* **279**, 51163-51171, (2004).
- 83 Feng, D. *et al.* Increase of a group of PTC(+) transcripts by curcumin through inhibition of the NMD pathway. *Biochim Biophys Acta* **1849**, 1104-1115, (2015).
- 84 Nickless, A. *et al.* Intracellular calcium regulates nonsense-mediated mRNA decay. *Nat Med* **20**, 961-966, (2014).
- 85 Durand, S. *et al.* Inhibition of nonsense-mediated mRNA decay (NMD) by a new chemical molecule reveals the dynamic of NMD factors in P-bodies. *J Cell Biol* **178**, 1145-1160, (2007).
- 86 Martin, L. *et al.* Identification and characterization of small molecules that inhibit nonsense-mediated RNA decay and suppress nonsense p53 mutations. *Cancer Res* **74**, 3104-3113, (2014).
- 87 Bhuvanagiri, M. *et al.* 5-azacytidine inhibits nonsense-mediated decay in a MYC-dependent fashion. *EMBO Mol Med* **6**, 1593-1609, (2014).
- 88 Jia, J. *et al.* Premature termination codon readthrough in human cells occurs in novel cytoplasmic foci and requires UPF proteins. *J Cell Sci* **130**, 3009-3022, (2017).
- 89 Huang, L. *et al.* Antisense suppression of the nonsense mediated decay factor Upf3b as a potential treatment for diseases caused by nonsense mutations. *Genome Biol* **19**, 4, (2018).
- 90 Usuki, F. *et al.* Specific inhibition of nonsense-mediated mRNA decay components, SMG-1 or Upf1, rescues the phenotype of Ullrich disease fibroblasts. *Mol Ther* **14**, 351-360, (2006).
- 91 Nomakuchi, T. T., Rigo, F., Aznarez, I. & Krainer, A. R. Antisense oligonucleotide-directed inhibition of nonsense-mediated mRNA decay. *Nat Biotechnol* **34**, 164-166, (2016).
- 92 Karijolic, J. & Yu, Y. T. Converting nonsense codons into sense codons by targeted pseudouridylation. *Nature* **474**, 395-398, (2011).
- 93 Lueck, J. D. *et al.* Engineered transfer RNAs for suppression of premature termination codons. *Nat Commun* **10**, 822, (2019).

- 94 Zhao, Y. *et al.* MicroRNA-mediated repression of nonsense mRNAs. *Elife* **3**, e03032, (2014).
- 95 Duursma, A. M., Kedde, M., Schrier, M., le Sage, C. & Agami, R. miR-148 targets human DNMT3b protein coding region. *RNA* **14**, 872-877, (2008).
- 96 Huang, S. *et al.* MicroRNA-181a modulates gene expression of zinc finger family members by directly targeting their coding regions. *Nucleic Acids Res* **38**, 7211-7218, (2010).
- 97 Ott, C. E. *et al.* MicroRNAs differentially expressed in postnatal aortic development downregulate elastin via 3' UTR and coding-sequence binding sites. *PLoS One* **6**, e16250, (2011).
- 98 Qin, W. *et al.* miR-24 regulates apoptosis by targeting the open reading frame (ORF) region of FAF1 in cancer cells. *PLoS One* **5**, e9429, (2010).
- 99 Schnall-Levin, M. *et al.* Unusually effective microRNA targeting within repeat-rich coding regions of mammalian mRNAs. *Genome Res* **21**, 1395-1403, (2011).
- 100 Tay, Y., Zhang, J., Thomson, A. M., Lim, B. & Rigoutsos, I. MicroRNAs to Nanog, Oct4 and Sox2 coding regions modulate embryonic stem cell differentiation. *Nature* **455**, 1124-1128, (2008).
